# Supplementary material
Source: Springer Nature journal article supplement (https://www.springermedizin.de/resource/supplementary/13023_2011_315_MOESM1_ESM.pdf/9642094)
Supplement: MOESM1 [file 9642094]

15 experts agreed to participate:  
- 8 metabolic physicians  
- 7 bone marrow transplant physicians

'Written' round 1

2 experts excluded from 'written' round 1:  
- 1 metabolic physician &  
1 bone marrow transplant physician (\*)

Consensus meeting/  
'written' round 2

1 metabolic physician:  
- did not attend the consensus meeting  
- sent results of 'written' round 2 by e-mail

1 bone marrow transplant physician:  
- did not attend the consensus meeting  
- did not give opinions in 'written' round 2

13 experts attended the consensus meeting *and* participated in 'written' round 2:  
- 7 metabolic physicians  
- 6 bone marrow transplant physicians
